# Supplementary material for: Hot Spot Mutagenesis Improves the Functional Expression of Unique Mammalian Odorant Receptors
Source: Int J Mol Sci. 2021 Dec 28;23(1):277. doi: 10.3390/ijms23010277 (PMC8745346; doi:10.3390/ijms23010277)
Supplement: Supplementary file 1 [file ijms-23-00277-s001.zip › Supplementary Data S1_Amino acid conservility of Mutated sites.xlsx]

## Sheet: Sheet1
Count	V75 (BW2.58)				E108 (BW3.39)				L112 (BW3.43)				Y120 (BW3.51)				C124 (BW3.55)				H128 (IC2)				I132 (IC2)				W146 (BW4.50)				G149 (BW4.53)				F150 (BW4.54)				L163 (EC2)				P164 (EC2)				V191(EC2)
	indepemdemt	depemdemt	ind + dep	all	indepemdemt	depemdemt	ind + dep	all	indepemdemt	depemdemt	ind + dep	all	indepemdemt	depemdemt	ind + dep	all	indepemdemt	depemdemt	ind + dep	all	indepemdemt	depemdemt	ind + dep	all	indepemdemt	depemdemt	ind + dep	all	indepemdemt	depemdemt	ind + dep	all	indepemdemt	depemdemt	ind + dep	all	indepemdemt	depemdemt	ind + dep	all	indepemdemt	depemdemt	ind + dep	all	indepemdemt	depemdemt	ind + dep	all	indepemdemt
consensus	v	t	v	v	e	e	e	e	l	l	l	l	y	y	y	y	c	c	c	c	h	h	h	h	i	i	i	i	w	w	w	w	g	g	g	g	f	f	f	f	l	l	l	l	p	p	p	p	l
a	3	18	21	119	0	0	0	0	0	0	0	0	0	1	1	6	0	0	0	5	0	0	0	0	0	1	1	32	0	2	2	10	1	14	15	106	1	7	8	48	0	1	1	5	0	2	2	9	1
r	0	0	0	1	0	0	0	1	0	0	0	0	0	0	0	0	0	2	2	11	7	26	33	248	2	4	6	32	0	0	0	0	0	0	0	0	0	0	0	0	0	1	1	9	1	5	6	27	0
n	0	1	1	4	1	1	2	10	0	0	0	0	0	0	0	0	0	0	0	0	0	5	5	22	0	1	1	7	0	0	0	1	0	2	2	14	0	2	2	21	0	0	0	1	0	7	7	45	0
d	0	0	0	0	1	20	21	121	0	0	0	0	0	0	0	0	0	0	0	0	0	0	0	0	0	1	1	7	0	0	0	0	0	0	0	0	0	0	0	0	0	0	0	1	0	7	7	48	0
c	0	0	0	7	0	0	0	0	0	0	0	1	0	2	2	13	25	113	138	985	0	0	0	2	0	0	0	0	0	4	4	20	0	5	5	20	0	5	5	44	0	0	0	0	0	4	4	16	0
q	0	1	1	3	1	0	1	7	0	0	0	0	0	0	0	0	0	0	0	0	1	4	5	25	0	2	2	3	0	0	0	0	0	0	0	1	0	0	0	0	0	0	0	5	0	1	1	16	0
e	0	0	0	1	23	103	126	932	0	0	0	0	0	0	0	0	0	0	0	0	0	0	0	0	0	0	0	0	0	0	0	0	0	0	0	0	0	0	0	0	0	0	0	0	0	1	1	13	0
g	0	6	6	34	0	0	0	5	0	0	0	0	0	0	0	0	0	2	2	7	0	0	0	0	0	1	1	1	0	1	1	11	21	77	98	722	0	3	3	25	0	0	0	1	0	0	0	2	0
h	0	0	0	0	0	0	0	4	0	0	0	0	0	4	4	14	0	0	0	6	14	48	62	478	0	1	1	11	0	1	1	2	0	0	0	0	0	2	2	10	0	0	0	0	0	3	3	26	0
i	4	22	26	191	0	0	0	1	0	1	1	8	0	0	0	0	0	0	0	0	0	0	0	6	14	69	83	620	0	3	3	17	0	0	0	2	1	7	8	101	1	4	5	38	0	1	1	13	6
l	2	6	8	73	0	1	1	2	26	121	147	1019	0	0	0	9	0	0	0	3	3	35	38	245	3	11	14	117	1	7	8	73	0	0	0	0	7	19	26	180	20	100	120	877	0	2	2	21	9
k	0	0	0	0	0	0	0	3	0	0	0	0	0	0	0	0	0	0	0	0	0	0	0	6	0	6	6	36	0	0	0	0	0	0	0	0	0	0	0	0	0	0	0	0	0	2	2	19	0
m	2	3	5	52	0	0	0	2	0	0	0	8	0	0	0	0	0	0	0	0	0	1	1	17	0	4	4	27	0	1	1	7	0	1	1	2	0	2	2	17	2	2	4	39	0	0	0	0	0
f	0	0	0	4	0	0	0	0	0	2	2	34	2	29	31	155	0	0	0	1	0	1	1	3	0	2	2	9	2	1	3	50	0	0	0	0	12	51	63	406	1	11	12	65	0	0	0	8	2
p	0	0	0	1	0	0	0	0	0	0	0	1	0	0	0	0	0	0	0	0	0	0	0	0	0	0	0	0	0	0	0	0	0	0	0	4	0	0	0	1	0	0	0	0	15	49	64	439	1
s	0	1	1	39	0	0	0	0	0	0	0	0	0	0	0	1	1	5	6	52	0	1	1	7	0	2	2	7	0	0	0	6	4	23	27	184	1	8	9	70	0	3	3	10	8	27	35	261	0
t	4	34	38	268	0	0	0	1	0	0	0	0	0	0	0	0	0	0	0	0	0	3	3	13	0	11	11	72	0	1	1	7	0	3	3	31	2	12	14	58	0	0	0	1	2	10	12	103	1
w	0	0	0	0	0	0	0	0	0	0	0	0	0	0	0	5	0	0	0	7	0	0	0	0	0	2	2	3	17	59	76	547	0	0	0	0	0	0	0	2	0	0	0	1	0	0	0	0	0
y	0	0	0	1	0	0	0	0	0	2	2	20	24	90	114	887	0	2	2	8	1	2	3	17	0	0	0	0	4	39	43	294	0	0	0	1	0	0	0	3	0	1	1	10	0	4	4	18	0
v	11	34	45	294	0	1	1	3	0	0	0	1	0	0	0	2	0	2	2	7	0	0	0	3	7	8	15	108	2	7	9	47	0	1	1	5	2	8	10	106	2	3	5	29	0	1	1	8	6
Frequency	V75 (BW2.58)				E108 (BW3.39)				L112 (BW3.43)				Y120 (BW3.51)				C124 (BW3.55)				H128 (IC2)				I132 (IC2)				W146 (BW4.50)				G149 (BW4.53)				F150 (BW4.54)				L163 (EC2)				P164 (EC2)				V191(EC2)
	indepemdemt	depemdemt	ind + dep	all	indepemdemt	depemdemt	ind + dep	all	indepemdemt	depemdemt	ind + dep	all	indepemdemt	depemdemt	ind + dep	all	indepemdemt	depemdemt	ind + dep	all	indepemdemt	depemdemt	ind + dep	all	indepemdemt	depemdemt	ind + dep	all	indepemdemt	depemdemt	ind + dep	all	indepemdemt	depemdemt	ind + dep	all	indepemdemt	depemdemt	ind + dep	all	indepemdemt	depemdemt	ind + dep	all	indepemdemt	depemdemt	ind + dep	all	indepemdemt
consensus	v	t	v	v	e	e	e	e	l	l	l	l	y	y	y	y	c	c	c	c	h	h	h	h	i	i	i	i	w	w	w	w	g	g	g	g	f	f	f	f	l	l	l	l	p	p	p	p	l
a	11.5	14.3	13.8	10.9	0	0	0	0	0	0	0	0	0	0.8	0.7	0.5	0	0	0	0.5	0	0	0	0	0	0.8	0.7	2.9	0	1.6	1.3	0.9	3.8	11.1	9.9	9.7	3.8	5.6	5.3	4.4	0	0.8	0.7	0.5	0	1.6	1.3	0.8	3.8
r	0	0	0	0.1	0	0	0	0.1	0	0	0	0	0	0	0	0	0	1.6	1.3	1	26.9	20.6	21.7	22.7	7.7	3.2	3.9	2.9	0	0	0	0	0	0	0	0	0	0	0	0	0	0.8	0.7	0.8	3.8	4	3.9	2.5	0
n	0	0.8	0.7	0.4	3.8	0.8	1.3	0.9	0	0	0	0	0	0	0	0	0	0	0	0	0	4	3.3	2	0	0.8	0.7	0.6	0	0	0	0.1	0	1.6	1.3	1.3	0	1.6	1.3	1.9	0	0	0	0.1	0	5.6	4.6	4.1	0
d	0	0	0	0	3.8	15.9	13.8	11.1	0	0	0	0	0	0	0	0	0	0	0	0	0	0	0	0	0	0.8	0.7	0.6	0	0	0	0	0	0	0	0	0	0	0	0	0	0	0	0.1	0	5.6	4.6	4.4	0
c	0	0	0	0.6	0	0	0	0	0	0	0	0.1	0	1.6	1.3	1.2	96.2	89.7	90.8	90.2	0	0	0	0.2	0	0	0	0	0	3.2	2.6	1.8	0	4	3.3	1.8	0	4	3.3	4	0	0	0	0	0	3.2	2.6	1.5	0
q	0	0.8	0.7	0.3	3.8	0	0.7	0.6	0	0	0	0	0	0	0	0	0	0	0	0	3.8	3.2	3.3	2.3	0	1.6	1.3	0.3	0	0	0	0	0	0	0	0.1	0	0	0	0	0	0	0	0.5	0	0.8	0.7	1.5	0
e	0	0	0	0.1	88.5	81.7	82.9	85.3	0	0	0	0	0	0	0	0	0	0	0	0	0	0	0	0	0	0	0	0	0	0	0	0	0	0	0	0	0	0	0	0	0	0	0	0	0	0.8	0.7	1.2	0
g	0	4.8	3.9	3.1	0	0	0	0.5	0	0	0	0	0	0	0	0	0	1.6	1.3	0.6	0	0	0	0	0	0.8	0.7	0.1	0	0.8	0.7	1	80.8	61.1	64.5	66.1	0	2.4	2	2.3	0	0	0	0.1	0	0	0	0.2	0
h	0	0	0	0	0	0	0	0.4	0	0	0	0	0	3.2	2.6	1.3	0	0	0	0.5	53.8	38.1	40.8	43.8	0	0.8	0.7	1	0	0.8	0.7	0.2	0	0	0	0	0	1.6	1.3	0.9	0	0	0	0	0	2.4	2	2.4	0
i	15.4	17.5	17.1	17.5	0	0	0	0.1	0	0.8	0.7	0.7	0	0	0	0	0	0	0	0	0	0	0	0.5	53.8	54.8	54.6	56.8	0	2.4	2	1.6	0	0	0	0.2	3.8	5.6	5.3	9.2	3.8	3.2	3.3	3.5	0	0.8	0.7	1.2	23.1
l	7.7	4.8	5.3	6.7	0	0.8	0.7	0.2	100	96	96.7	93.3	0	0	0	0.8	0	0	0	0.3	11.5	27.8	25	22.4	11.5	8.7	9.2	10.7	3.8	5.6	5.3	6.7	0	0	0	0	26.9	15.1	17.1	16.5	76.9	79.4	78.9	80.3	0	1.6	1.3	1.9	34.6
k	0	0	0	0	0	0	0	0.3	0	0	0	0	0	0	0	0	0	0	0	0	0	0	0	0.5	0	4.8	3.9	3.3	0	0	0	0	0	0	0	0	0	0	0	0	0	0	0	0	0	1.6	1.3	1.7	0
m	7.7	2.4	3.3	4.8	0	0	0	0.2	0	0	0	0.7	0	0	0	0	0	0	0	0	0	0.8	0.7	1.6	0	3.2	2.6	2.5	0	0.8	0.7	0.6	0	0.8	0.7	0.2	0	1.6	1.3	1.6	7.7	1.6	2.6	3.6	0	0	0	0	0
f	0	0	0	0.4	0	0	0	0	0	1.6	1.3	3.1	7.7	23	20.4	14.2	0	0	0	0.1	0	0.8	0.7	0.3	0	1.6	1.3	0.8	7.7	0.8	2	4.6	0	0	0	0	46.2	40.5	41.4	37.2	3.8	8.7	7.9	6	0	0	0	0.7	7.7
p	0	0	0	0.1	0	0	0	0	0	0	0	0.1	0	0	0	0	0	0	0	0	0	0	0	0	0	0	0	0	0	0	0	0	0	0	0	0.4	0	0	0	0.1	0	0	0	0	57.7	38.9	42.1	40.2	3.8
s	0	0.8	0.7	3.6	0	0	0	0	0	0	0	0	0	0	0	0.1	3.8	4	3.9	4.8	0	0.8	0.7	0.6	0	1.6	1.3	0.6	0	0	0	0.5	15.4	18.3	17.8	16.8	3.8	6.3	5.9	6.4	0	2.4	2	0.9	30.8	21.4	23	23.9	0
t	15.4	27	25	24.5	0	0	0	0.1	0	0	0	0	0	0	0	0	0	0	0	0	0	2.4	2	1.2	0	8.7	7.2	6.6	0	0.8	0.7	0.6	0	2.4	2	2.8	7.7	9.5	9.2	5.3	0	0	0	0.1	7.7	7.9	7.9	9.4	3.8
w	0	0	0	0	0	0	0	0	0	0	0	0	0	0	0	0.5	0	0	0	0.6	0	0	0	0	0	1.6	1.3	0.3	65.4	46.8	50	50.1	0	0	0	0	0	0	0	0.2	0	0	0	0.1	0	0	0	0	0
y	0	0	0	0.1	0	0	0	0	0	1.6	1.3	1.8	92.3	71.4	75	81.2	0	1.6	1.3	0.7	3.8	1.6	2	1.6	0	0	0	0	15.4	31	28.3	26.9	0	0	0	0.1	0	0	0	0.3	0	0.8	0.7	0.9	0	3.2	2.6	1.6	0
v	42.3	27	29.6	26.9	0	0.8	0.7	0.3	0	0	0	0.1	0	0	0	0.2	0	1.6	1.3	0.6	0	0	0	0.3	26.9	6.3	9.9	9.9	7.7	5.6	5.9	4.3	0	0.8	0.7	0.5	7.7	6.3	6.6	9.7	7.7	2.4	3.3	2.7	0	0.8	0.7	0.7	23.1
[truncated: 51 more columns]
