# Supplementary material for: Hot Spot Mutagenesis Improves the Functional Expression of Unique Mammalian Odorant Receptors
Source: Int J Mol Sci. 2021 Dec 28;23(1):277. doi: 10.3390/ijms23010277 (PMC8745346; doi:10.3390/ijms23010277)
Supplement: Supplementary file 1 [file ijms-23-00277-s001.zip › Supplementary Data S2_EC50 of OR responses.xlsx]

## Sheet: Figure 3&S5
EC50
	Olfr544	Response				No response
	Agonist	Azelaic acid	Octanedioic acid	Nonanedioic acid	Decanedioic acid	Propanedioic acid	Butanedioic acid	Pentanedioic acid	Hexanedioic acid	Heptanedioic acid
Wildtype	WT	0.00220224	4.31e-05	1.872e-06	9.764e-06	2.664e-11	4.307e-07	2.548e-05	2.805e-05	3.797e-10
	WT+RTP1S	5.73e-05	1.491e-05	8.254e-07	1.163e-06	2.201e-31	2.213	2.531	7.213e-06	3.215e-13
Mutant	D3.39E	4.55e-05	2.652e-05	2.449e-06	1.488e-05	8.24e-179	3.095e-07	2.056e-12	3.22e-07	5.485e-13
	D3.39E+RTP1S	5.58e-05	3.278e-05	2.845e-06	6.217e-06	1.074e-11	1.1228e-12	2.095e-29	N/A	7.121e-12
	D3.39R	N/A
	D3.39R+RTP1S	N/A
	D3.39K	4.699e-07
	D3.39K+RTP1S	3.499e-07
	D3.39N	7.321e-05
	D3.39N+RTP1S	5.464e-05

## Sheet: Figure 4
EC50
	OR	Olfr339	Olfr378	Olfr978	Olfr979	Olfr982	Olfr62	Olfr992	Olfr1352	Olfr1353	Olfr1377	Olfr960	Olfr960	Olfr1512
	Ligand	Acetophenone	Acetophenone	Eugenol	Eugenol	Eugenol	2-coumaranone	Amylacetate	Acetophenone	Acetophenone	Acetophenone	Eugenol	Eugenol	Eugenol
Wildtype	WT	7.605e-06	2.4e-05	0.00223	2.934e-06	2.953e-05	180.6	9.016e-06	5.992e-06	0.0001688	2.24	1.672e-05	9.774e-05	1.777e-05
	WT+RTP1S	0.0003231	5.78e-06	1.158e-06	8.291e-06	9.242e-05	5.602e-05	0.0003859	0.0007796	0.001201	8.197e-05	0.00105	5.691e-09	1.907e-06
Mutant	3.39E	2.896	1.36e-05					1.534e-05	2.946e-06	6.167e-05	1.052	9.07e-08	4.343e-06	0.9783
	3.39E+RTP1S	2.375	1.96e-05					0.1563	0.000322	0.403	0.0007159	3.125e-05	3.423	2.721e-06
	3.43L			0.3142	6.897e-06	4.544e-05	6.969e-06					5.521e-07	3.678e-08	3.49e-06
	3.43L+RTP1S			1.335e-07	2.93e-06	4.194e-06	0.5788					31.54	9.334e-05	1.09e-06
	3.39E&3.43L											4.081e-07	0.0002514	2.797e-06
	3.39E&3.43L+RTP1S											3.471e-06	4.572e-06	2.559e-06

## Sheet: Figure 5
	OR
	Agonist
EC50
	OR	Olfr733	Olfr1508
	Ligand	Hexanal	CuCl2
Wildtype	WT	8.735e-07	1.247e-06
	WT+RTP1S	1.379e-06	1.747e-06
Mutant	E3.39D	5.843e-07	7.561e-05
	E3.39D+RTP1S	0.08443	0.0002638
	L3.43Y	1.832e-07	8.313e-07
	L3.43Y+RTP1S	4.752e-06	1.174e-06

## Sheet: Figure 6&S6
EC50
	OR	OR10G7	OR7D4	OR10J5
	Agonist	Eugenol	Androstenone	Lyral
Wildtype	WT	N/A	N/A	1.201
	WT+RTP1S	2.101e-05	1.782e-05	0.6615
Mutant	3.39E		0.0001276	0.0005697
	3.39E+RTP1S		2.261e-06	0.005346
	3.43L	6.521e-05
	3.43L+RTP1S	2.559e-06
