# Supplementary material for: Hot Spot Mutagenesis Improves the Functional Expression of Unique Mammalian Odorant Receptors
Source: Int J Mol Sci. 2021 Dec 28;23(1):277. doi: 10.3390/ijms23010277 (PMC8745346; doi:10.3390/ijms23010277)
Supplement: Supplementary file 1 [file ijms-23-00277-s001.zip › Supporting Information_ijms-1494812_R1.pdf]

## Supporting Information

### **Hot spot mutagenesis improves the functional expression of unique mammalian odorant receptors.**

Yosuke Fukutani<sup>1,2,3</sup>, Yuko Nakamura<sup>1</sup>, Shunta Miyanaga<sup>1</sup>, Kentaro Ikegami<sup>1,2</sup>, Nonoko Muto<sup>1</sup>, Reina Kanemaki<sup>1</sup>, Keiichi Noguchi<sup>4</sup>, Ikuroh Ohsawa<sup>5</sup>, Hiroaki Matsunami<sup>2,3,6</sup>, Masafumi Yohda<sup>1,3</sup>

<sup>1</sup>Department of Biotechnology and Life Science, Tokyo University of Agriculture and Technology, Koganei, Tokyo 184-8588, Japan; <sup>2</sup>Department of Molecular Genetics and Microbiology, Duke University Medical Center, Durham, NC 27710, United States; <sup>3</sup>Institute of Global Innovation Research, Tokyo University of Agriculture and Technology, Koganei, Tokyo 184-8588, Japan; <sup>4</sup>Instrumentation Analysis Center, Tokyo University of Agriculture and Technology, Koganei, Tokyo, 184-8588, Japan. <sup>5</sup>Biological Process of Aging, Tokyo Metropolitan Institute of Gerontology, Tokyo, 173-0015, Japan, <sup>6</sup>Department of Neurobiology, Duke Institute for Brain Sciences, Duke University Medical Center, Durham, NC 27705, United States;

## **TABLE OF CONTENTS**

**Figure S1 Normalized value of the cell-surface expression of the Rho-tagged ORs and each mutants.**

**Figure S2 Cell-surface expression of the Rho-tagged RTP independent ORs and mutants.**

**Figure S3 Cell-surface expression of the Rho-tagged RTP dependent ORs and mutants.**

**Figure S4 Comparison of amino acid sequences of Ofr544 and its homologues**

**Figure S5 Analysis of Olfr544 D3,39 mutants**

**Figure S6 Effect of 3.39E and 3.43L mutant for Human ORs**

**Figure S7 Sequence conservation of the 15 residues predicted the sodium ion binding pocket in mouse and human ORs**

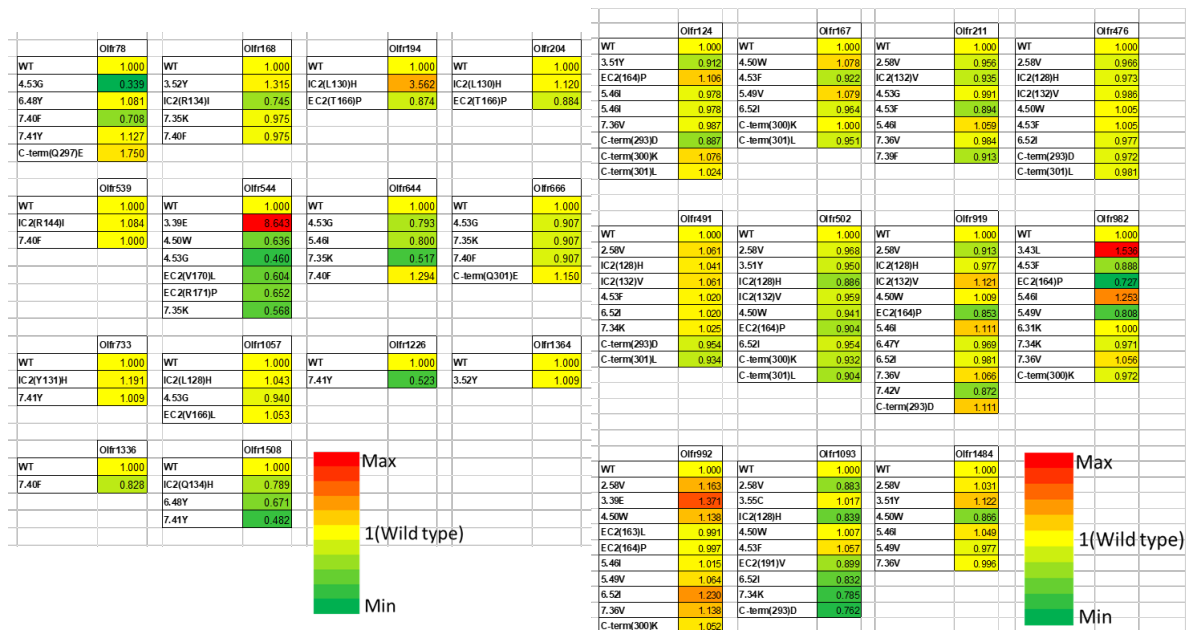

**Supplementary Figure S1 Normalized value of the cell-surface expression of the Rho-tagged ORs and each mutants.**

Refer to the Geometric mean value calculated by FlowJo software, the values of OR mutants were used as the wild type (=1).

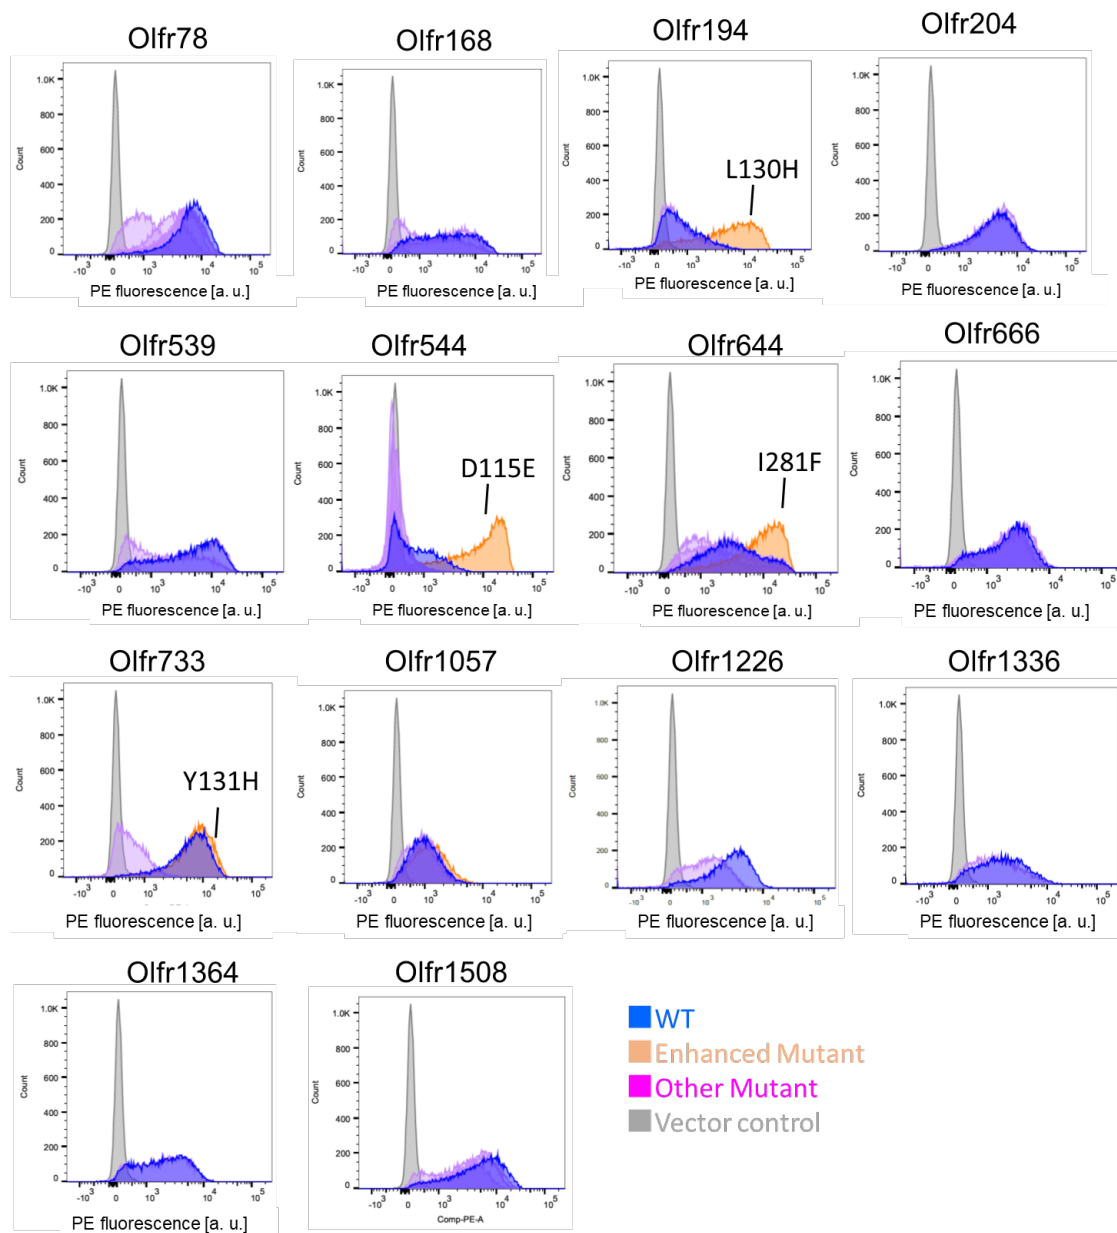

**Supplementary Figure S2 Cell-surface expression of the Rho-tagged RTP independent ORs and each mutants.**

Each mutant was transfected into HEK293T cells, and the cell surface expression level was measured.

X-axis: PE fluorescence, Y-axis: cell number.

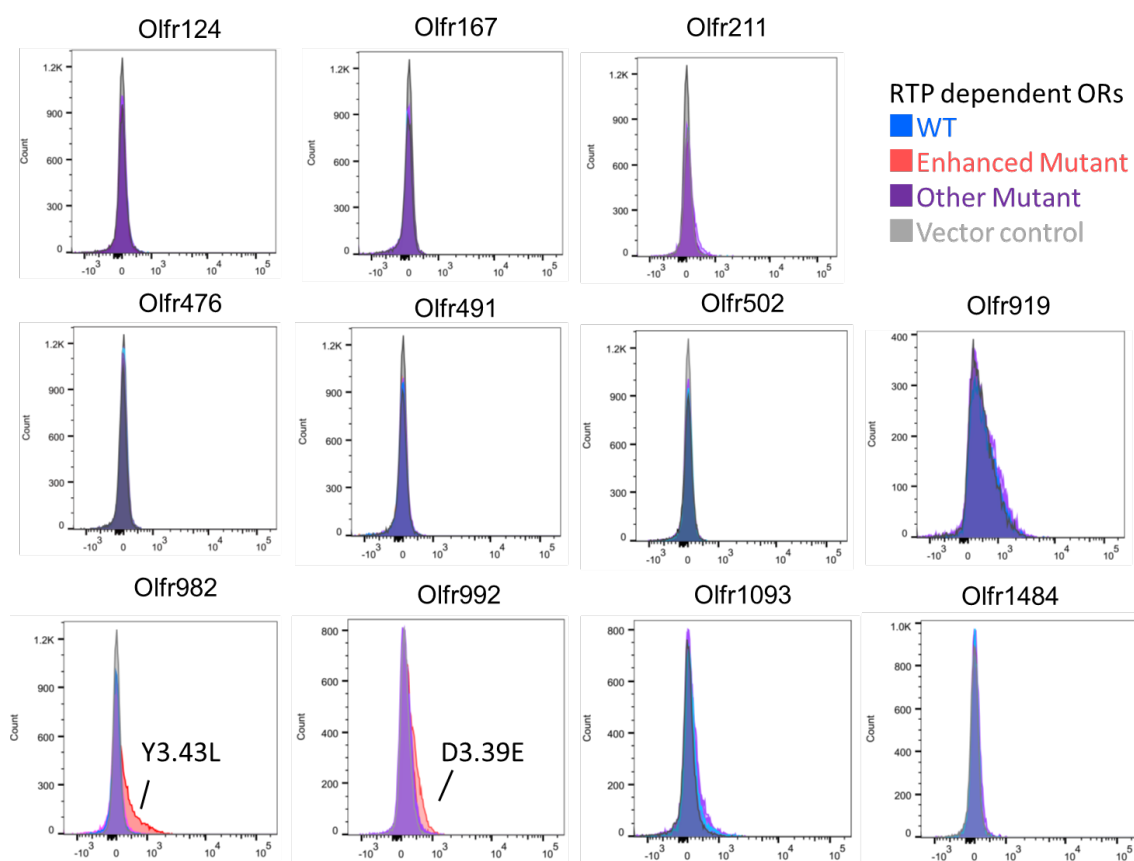

**Supplementary Figure S3 Cell-surface expression of the Rho-tagged RTP dependent ORs and each mutants.**

Each mutant was transfected into HEK293T cells, and the cell surface expression level was measured.

X-axis: PE fluorescence, Y-axis: cell number.



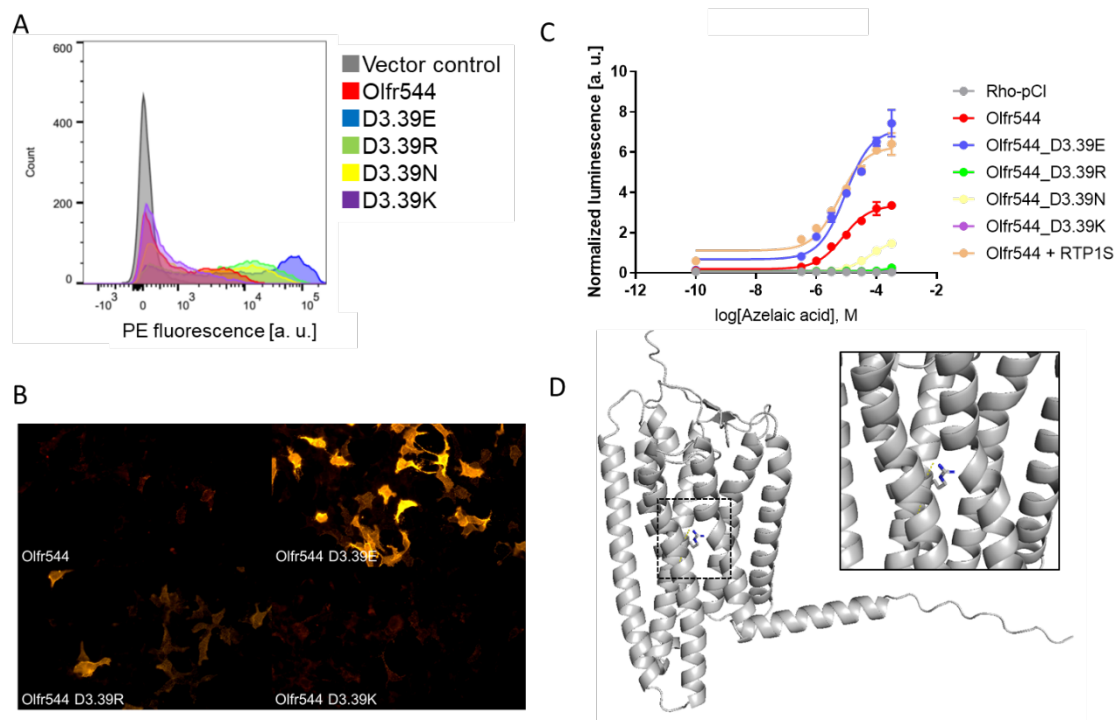

**Supplementary Figure S5 Analysis of Olfr544 D115<sup>BW3.39</sup> mutants**

A) The cell-surface expression of the Rho-tagged ORs and D3.39 mutants. Each mutant was transfected into HEK293T cells, and the cell surface expression level was measured. X-axis: PE fluorescence, Y-axis: cell number. B) Immunocytochemical image of Olfr544 and mutants stained by anti-Rho4D2 mouse antibody and PE-conjugated anti-mouse IgG goat antibody. C) Dose response curve of Olfr544 and D3.39 mutants to nonanedioic acid. Error bars indicate s.e.m (n=3). D) Structural model of Olfr544 and D3.39R mutant using Alphafold 2 prediction.

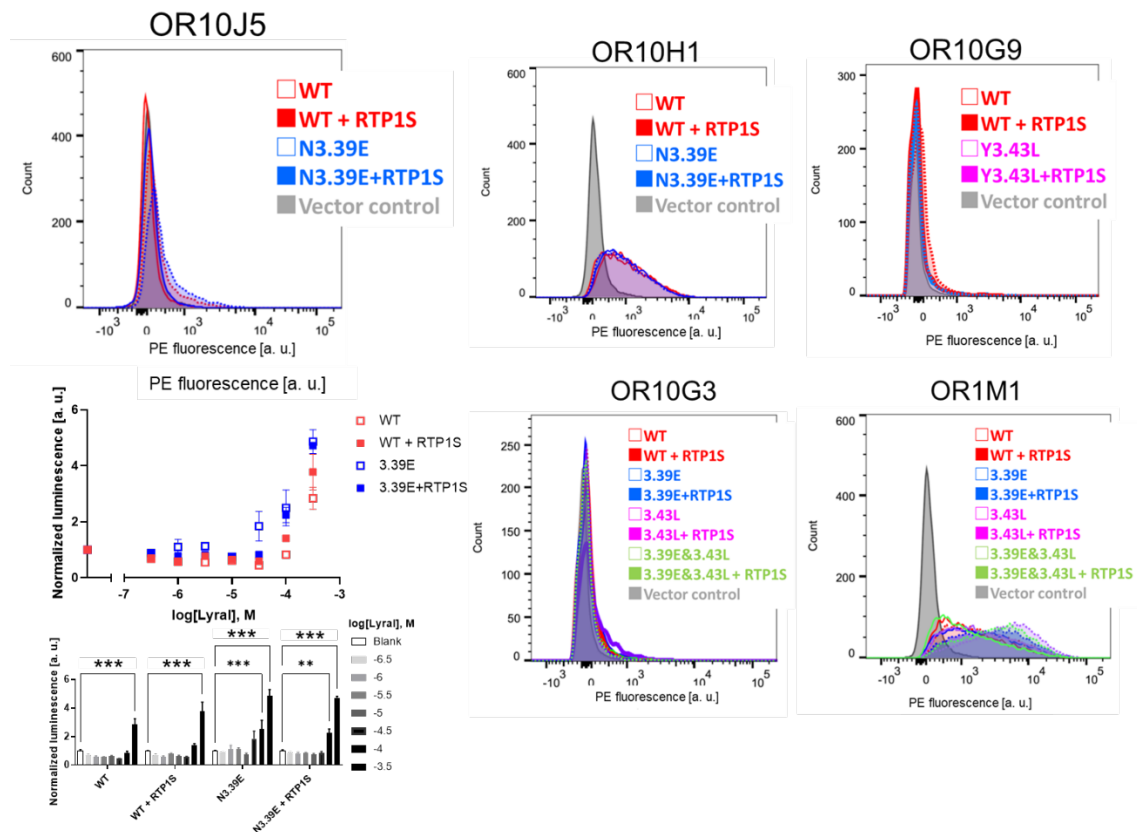

**Supplementary Figure S6 Effect of 3.39E and 3.43L mutant for Human ORs**

Left) Analysis of OR10J5. Top : The cell-surface expression of the Rho-tagged ORs and D3.39 mutants.

Each mutant was transfected into HEK293T cells, and the cell surface expression level was measured.

X-axis: PE fluorescence, Y-axis: cell number. Bottom: Dose response curve of OR10J5 to Lyr. Error

bars indicate s.e.m (n=3). Multiple comparisons were performed using one-way ANOVA followed by

Dunnett's test (\*\*p<0.01, \*\*\*p<0.001)

Right) The cell-surface expression of the Rho-tagged ORs (OR10H1, OR10G3, OR10G9 and OR1M1)

and 3.39E and 3.43L mutants.

## Mouse

|              | 1.50 | 1.53 | 2.46 | 2.47 | 2.49 | 2.50 | 3.39 | 3.43 | 6.44 | 6.48 | 7.45 | 7.46 | 7.49 | 7.50 | 7.53 |
|--------------|------|------|------|------|------|------|------|------|------|------|------|------|------|------|------|
| A            | 0    | 0    | 0    | 252  | 54   | 0    | 0    | 0    | 8    | 0    | 65   | 14   | 0    | 1    | 0    |
| C            | 0    | 0    | 0    | 0    | 16   | 0    | 0    | 1    | 0    | 3    | 0    | 3    | 0    | 0    | 0    |
| D            | 0    | 0    | 0    | 2    | 0    | 917  | 121  | 0    | 0    | 0    | 0    | 0    | 2    | 0    | 0    |
| E            | 0    | 0    | 0    | 0    | 0    | 169  | 933  | 0    | 0    | 0    | 3    | 0    | 0    | 0    | 0    |
| F            | 0    | 0    | 83   | 1    | 7    | 0    | 0    | 34   | 15   | 269  | 10   | 0    | 0    | 0    | 10   |
| G            | 0    | 0    | 0    | 4    | 1    | 0    | 5    | 0    | 0    | 0    | 13   | 1    | 0    | 0    | 0    |
| H            | 0    | 0    | 0    | 0    | 0    | 0    | 4    | 0    | 0    | 23   | 0    | 0    | 0    | 1    | 1    |
| I            | 0    | 655  | 1    | 0    | 189  | 0    | 1    | 8    | 116  | 4    | 237  | 0    | 0    | 0    | 0    |
| K            | 0    | 1    | 1    | 0    | 0    | 0    | 3    | 0    | 0    | 0    | 0    | 0    | 1    | 0    | 0    |
| L            | 0    | 210  | 1002 | 3    | 323  | 0    | 2    | 1020 | 7    | 21   | 2    | 1    | 0    | 2    | 0    |
| M            | 0    | 179  | 4    | 1    | 76   | 0    | 2    | 8    | 6    | 0    | 2    | 0    | 0    | 0    | 0    |
| N            | 1093 | 0    | 0    | 0    | 20   | 7    | 10   | 0    | 0    | 0    | 17   | 0    | 1083 | 0    | 0    |
| P            | 0    | 0    | 0    | 0    | 1    | 0    | 0    | 1    | 0    | 0    | 160  | 1050 | 0    | 1087 | 0    |
| Q            | 0    | 0    | 0    | 0    | 0    | 0    | 7    | 0    | 0    | 14   | 0    | 12   | 0    | 0    | 0    |
| R            | 0    | 0    | 0    | 0    | 0    | 0    | 1    | 0    | 0    | 0    | 0    | 0    | 0    | 0    | 0    |
| S            | 0    | 0    | 0    | 829  | 65   | 0    | 0    | 0    | 0    | 5    | 47   | 11   | 6    | 2    | 0    |
| T            | 0    | 22   | 0    | 0    | 106  | 0    | 1    | 0    | 3    | 0    | 466  | 1    | 0    | 0    | 0    |
| V            | 0    | 26   | 1    | 1    | 235  | 0    | 3    | 1    | 938  | 1    | 71   | 0    | 0    | 0    | 0    |
| W            | 0    | 0    | 0    | 0    | 0    | 0    | 0    | 0    | 0    | 0    | 0    | 0    | 0    | 0    | 0    |
| Y            | 0    | 0    | 1    | 0    | 0    | 0    | 0    | 20   | 0    | 753  | 0    | 0    | 1    | 0    | 1082 |
| Total        | 1093 | 1093 | 1093 | 1093 | 1093 | 1093 | 1093 | 1093 | 1093 | 1093 | 1093 | 1093 | 1093 | 1093 | 1093 |
| OR consensus | N    | I    | L    | S    | L    | D    | E    | L    | V    | Y    | T    | P    | N    | P    | Y    |
| Other GPCRs  | N    | V    | L    | A    | A    | D    | S    | L    | F    | W    | N    | S    | N    | P    | Y    |

## Human

|              | 1.50 | 1.53 | 2.46 | 2.47 | 2.49 | 2.50 | 3.39 | 3.43 | 6.44 | 6.48 | 7.45 | 7.46 | 7.49 | 7.50 | 7.53 |
|--------------|------|------|------|------|------|------|------|------|------|------|------|------|------|------|------|
| A            | 0    | 0    | 0    | 87   | 21   | 0    | 0    | 1    | 3    | 0    | 17   | 4    | 0    | 0    | 0    |
| C            | 0    | 0    | 0    | 1    | 1    | 0    | 0    | 0    | 0    | 4    | 0    | 0    | 0    | 1    | 3    |
| D            | 0    | 0    | 0    | 2    | 0    | 318  | 51   | 0    | 0    | 0    | 0    | 0    | 0    | 0    | 1    |
| E            | 0    | 0    | 0    | 0    | 0    | 67   | 315  | 0    | 0    | 0    | 0    | 0    | 0    | 0    | 0    |
| F            | 0    | 0    | 22   | 1    | 2    | 0    | 0    | 11   | 8    | 92   | 7    | 0    | 0    | 0    | 9    |
| G            | 0    | 0    | 0    | 2    | 0    | 1    | 2    | 0    | 0    | 0    | 1    | 0    | 0    | 0    | 0    |
| H            | 0    | 0    | 0    | 0    | 0    | 0    | 7    | 0    | 0    | 10   | 0    | 1    | 0    | 0    | 2    |
| I            | 0    | 242  | 0    | 0    | 72   | 0    | 0    | 7    | 46   | 1    | 57   | 0    | 0    | 0    | 0    |
| K            | 2    | 2    | 1    | 0    | 0    | 0    | 1    | 0    | 0    | 0    | 0    | 0    | 1    | 0    | 0    |
| L            | 0    | 82   | 364  | 0    | 121  | 0    | 0    | 361  | 4    | 6    | 1    | 3    | 0    | 4    | 2    |
| M            | 0    | 59   | 3    | 0    | 35   | 0    | 1    | 1    | 4    | 0    | 1    | 0    | 0    | 0    | 0    |
| N            | 386  | 0    | 0    | 0    | 2    | 3    | 7    | 0    | 0    | 0    | 15   | 0    | 377  | 0    | 0    |
| P            | 0    | 0    | 0    | 1    | 1    | 0    | 0    | 1    | 0    | 0    | 63   | 371  | 2    | 378  | 0    |
| Q            | 0    | 0    | 0    | 0    | 0    | 0    | 3    | 0    | 0    | 2    | 0    | 3    | 1    | 0    | 1    |
| R            | 0    | 0    | 0    | 0    | 2    | 0    | 0    | 0    | 0    | 1    | 0    | 1    | 0    | 0    | 0    |
| S            | 0    | 0    | 0    | 295  | 24   | 0    | 2    | 0    | 0    | 5    | 14   | 5    | 8    | 7    | 0    |
| T            | 1    | 1    | 0    | 0    | 34   | 0    | 1    | 0    | 0    | 2    | 198  | 2    | 1    | 0    | 0    |
| V            | 0    | 4    | 0    | 1    | 75   | 0    | 0    | 0    | 325  | 0    | 16   | 0    | 0    | 0    | 0    |
| W            | 0    | 0    | 0    | 0    | 0    | 0    | 0    | 0    | 0    | 0    | 0    | 0    | 0    | 0    | 0    |
| Y            | 1    | 0    | 0    | 0    | 0    | 1    | 0    | 8    | 0    | 267  | 0    | 0    | 0    | 0    | 372  |
| Total        | 390  | 390  | 390  | 390  | 390  | 390  | 390  | 390  | 390  | 390  | 390  | 390  | 390  | 390  | 390  |
| OR consensus | N    | I    | L    | S    | L    | D    | E    | L    | V    | Y    | T    | P    | N    | P    | Y    |
| Other GPCRs  | N    | V    | L    | A    | A    | D    | S    | L    | F    | W    | N    | S    | N    | P    | Y    |

**Supplementary Figure S7 Amino acids conservation in mouse and human ORs on the 15 residues placed surrounding the sodium ion binding pocket among class A GPCR**
